# Supplementary material for: Conversion of Central Subfield Thickness Measurements of Diabetic Macular Edema Across Cirrus and Spectralis Optical Coherence Tomography Instruments
Source: PubMed Central journal article supplement — Transl Vis Sci Technol. 2021 Dec 30;10(14):34. doi: 10.1167/tvst.10.14.34 (PMC8727314; doi:10.1167/tvst.10.14.34), 2021-12-30
Supplement: tvst-10-14-34_s002.pdf [file tvst-10-14-34_s002.pdf]

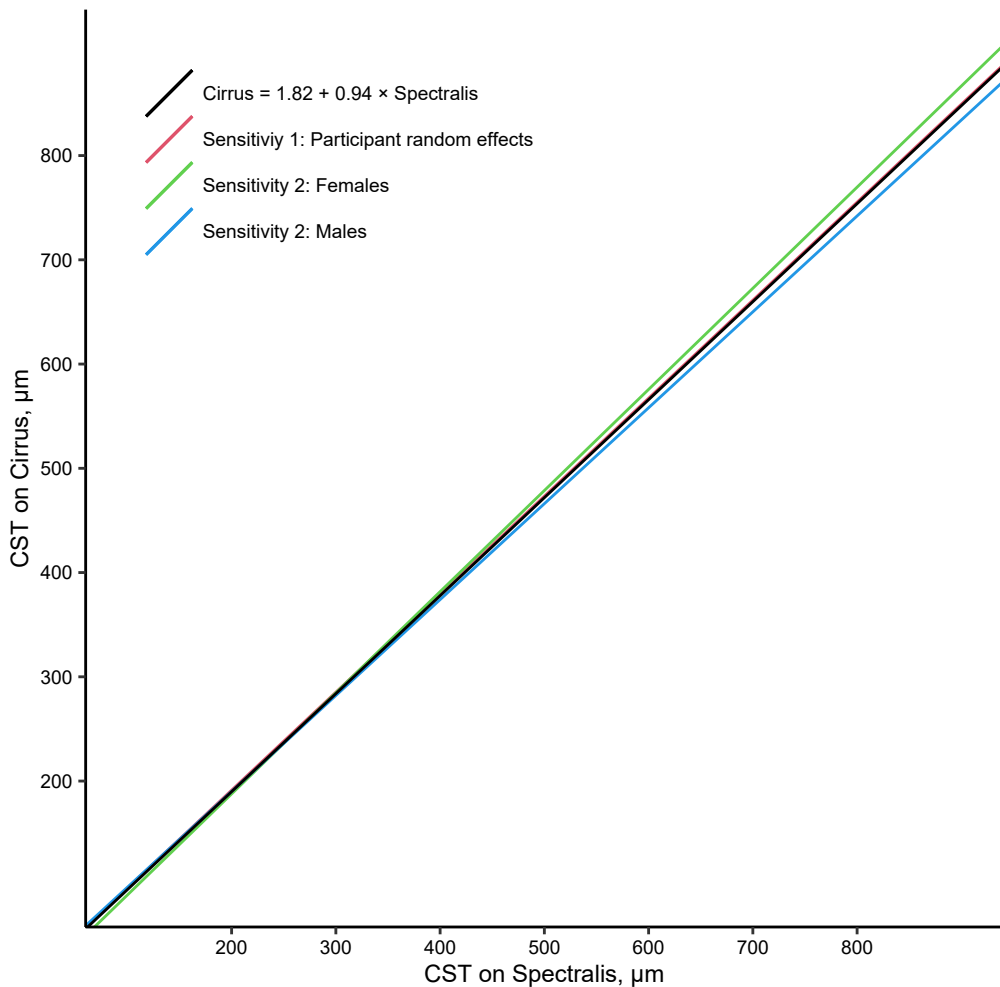

eFigure 2.

Sensitivity analysis for the estimation of the conversion equation for predicting central subfield thickness (CST) values on a Cirrus machine from CST observed on a Spectralis machine included estimating the conversion equation from the training sample subset (70% of the full sample) when (1) two levels of random effects (participant and eye) were specified and when (2) gender and gender machine interaction terms were included in the regression equation, and one level of random effects (eye) were specified.
