# Supplementary material for: Conversion of Central Subfield Thickness Measurements of Diabetic Macular Edema Across Cirrus and Spectralis Optical Coherence Tomography Instruments
Source: PubMed Central journal article supplement — Transl Vis Sci Technol. 2021 Dec 30;10(14):34. doi: 10.1167/tvst.10.14.34 (PMC8727314; doi:10.1167/tvst.10.14.34), 2021-12-30
Supplement: tvst-10-14-34_s004.pdf [file tvst-10-14-34_s004.pdf]

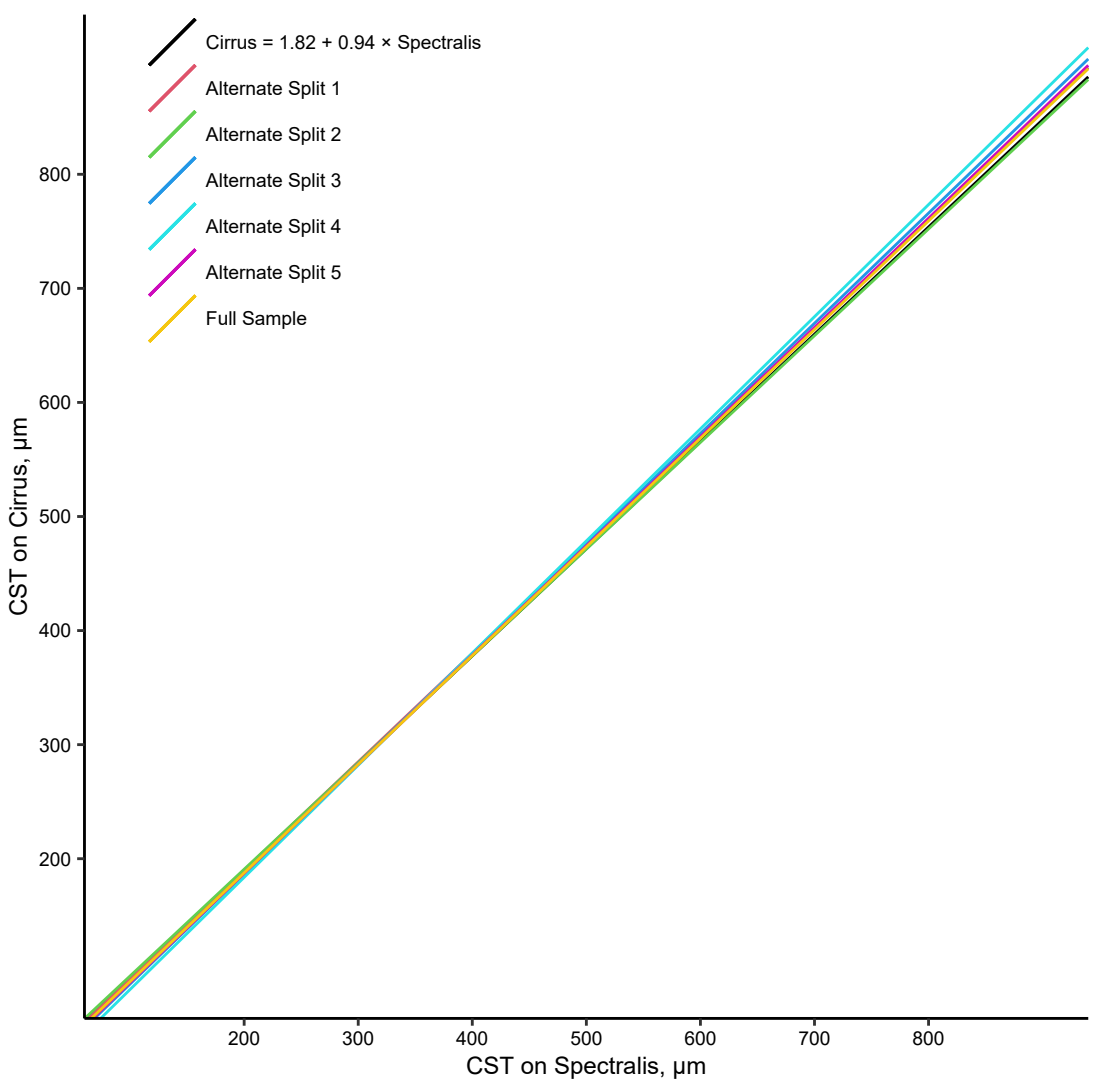

eFigure 4.

Sensitivity analysis for the estimation of the conversion equation for predicting central subfield thickness (CST) values on a Cirrus machine from CST observed on a Spectralis machine when different random (70%) splits were used and when the full sample was used.
