# Supplementary material for: Conversion of Central Subfield Thickness Measurements of Diabetic Macular Edema Across Cirrus and Spectralis Optical Coherence Tomography Instruments
Source: PubMed Central journal article supplement — Transl Vis Sci Technol. 2021 Dec 30;10(14):34. doi: 10.1167/tvst.10.14.34 (PMC8727314; doi:10.1167/tvst.10.14.34), 2021-12-30
Supplement: tvst-10-14-34_s005.pdf [file tvst-10-14-34_s005.pdf]

Supplemental Table 1: Sensitivity Analysis 1 and 2

|                                                     | Observed vs. Predicted Comparisons<br>Protocol O Validation Data |                               |                                     |                               |
|-----------------------------------------------------|------------------------------------------------------------------|-------------------------------|-------------------------------------|-------------------------------|
|                                                     | Sensitivity Analysis 1 <sup>a</sup>                              |                               | Sensitivity Analysis 2 <sup>b</sup> |                               |
| No. eyes                                            | n = 56                                                           |                               | n = 56                              |                               |
| No. meas. pairs                                     | N = 112                                                          | N = 112                       | N = 112                             | N = 112                       |
| CST, $\mu\text{m}$                                  | Spectralis                                                       | Cirrus                        | Spectralis                          | Cirrus                        |
| Mean (SD)                                           | 394 (135)                                                        | 372 (140)                     | 394 (135)                           | 372 (140)                     |
| Median (IQR)                                        | 347 (306, 434)                                                   | 336 (283, 400)                | 347 (306, 434)                      | 336 (283, 400)                |
| Compared to CST, $\mu\text{m}$                      | Predicted Spectralis <sup>c</sup>                                | Predicted Cirrus <sup>d</sup> | Predicted Spectralis <sup>e</sup>   | Predicted Cirrus <sup>f</sup> |
| Mean (SD)                                           | 393 (133)                                                        | 370 (126)                     | 393 (133)                           | 372 (127)                     |
| Median (IQR)                                        | 359 (308, 419)                                                   | 326 (287, 407)                | 356 (308, 420)                      | 328 (289, 410)                |
| Absolute difference, $\mu\text{m}$ , % <sup>g</sup> |                                                                  |                               |                                     |                               |
| Min                                                 | 0, 0%                                                            | 0, 0%                         | 0, 0%                               | 0, 0%                         |
| 5th percentile                                      | 2, 0%                                                            | 1, 0%                         | 2, 0%                               | 1, 0%                         |
| 10th percentile                                     | 2, 1%                                                            | 2, 1%                         | 3, 1%                               | 2, 1%                         |
| 25th percentile                                     | 6, 2%                                                            | 5, 1%                         | 6, 2%                               | 5, 1%                         |
| Mean                                                | 21, 5%                                                           | 21, 6%                        | 22, 5%                              | 21, 6%                        |
| Median                                              | 13, 4%                                                           | 10, 3%                        | 12, 4%                              | 9, 3%                         |
| 75th percentile                                     | 20, 6%                                                           | 24, 6%                        | 21, 6%                              | 22, 6%                        |
| 90th percentile                                     | 48, 10%                                                          | 47, 13%                       | 47, 10%                             | 50, 11%                       |
| 95th percentile                                     | 83, 18%                                                          | 83, 19%                       | 89, 18%                             | 89, 20%                       |
| Max                                                 | 184, 49%                                                         | 195, 61%                      | 190, 51%                            | 195, 64%                      |
| Difference, $\mu\text{m}$ , % <sup>g</sup>          |                                                                  |                               |                                     |                               |
| Min                                                 | -143, -35%                                                       | -195, -36%                    | -143, -35%                          | -195, -36%                    |
| 5th percentile                                      | -58, -16%                                                        | -47, -10%                     | -61, -17%                           | -50, -11%                     |
| 10th percentile                                     | -36, -8%                                                         | -30, -5%                      | -39, -7%                            | -27, -5%                      |
| 25th percentile                                     | -9, -2%                                                          | -11, -4%                      | -10, -3%                            | -9, -3%                       |
| Mean                                                | -1, 0%                                                           | -3, 1%                        | -1, 0%                              | -0, 1%                        |
| Median                                              | 4, 1%                                                            | -4, -1%                       | 5, 1%                               | -2, -1%                       |
| 75th percentile                                     | 14, 4%                                                           | 6, 2%                         | 13, 4%                              | 9, 3%                         |
| 90th percentile                                     | 20, 6%                                                           | 30, 8%                        | 20, 6%                              | 31, 9%                        |
| 95th percentile                                     | 35, 8%                                                           | 58, 17%                       | 43, 8%                              | 60, 20%                       |
| Max                                                 | 184, 49%                                                         | 146, 61%                      | 190, 51%                            | 152, 64%                      |

<sup>a</sup> In Sensitivity Analysis 1, the conversion equations were estimated from the training data when two levels of random effects (participant and eye) were specified.

<sup>b</sup> In sensitivity analysis 2, the conversion equations were estimated from the training data when sex and sex-instrument interaction terms were included in the regression equation, and one level of random effects (eye) were specified.

<sup>c</sup> Predicted Spectralis =  $40.09 + 0.95 \times \text{Cirrus}$

<sup>d</sup> Predicted Cirrus =  $3.24 + 0.94 \times \text{Spectralis}$

<sup>e</sup> Predicted Spectralis =  $36.16 + 12.28 \times \text{Female} + 0.97 \times \text{Cirrus} - 0.05 \times \text{Cirrus} \times \text{Female}$

<sup>f</sup> Predicted Cirrus =  $6.07 - 12.39 \times \text{Female} + 0.92 \times \text{Spectralis} + 0.05 \times \text{Spectralis} \times \text{Female}$

<sup>g</sup>Differences were calculated as (Predicted – Observed value) and relative differences as [(Predicted – Observed value)/Observed value]\*100%.
