# Supplementary material for: Conversion of Central Subfield Thickness Measurements of Diabetic Macular Edema Across Cirrus and Spectralis Optical Coherence Tomography Instruments
Source: PubMed Central journal article supplement — Transl Vis Sci Technol. 2021 Dec 30;10(14):34. doi: 10.1167/tvst.10.14.34 (PMC8727314; doi:10.1167/tvst.10.14.34), 2021-12-30
Supplement: tvst-10-14-34_s006.pdf [file tvst-10-14-34_s006.pdf]

Supplemental Table 2: Sensitivity Analysis 3

| Observed vs. Predicted Comparisons in Protocol O Validation Data<br>using Different Random 70/30% Train/Test Splits |                                                    |                            |                                            |                            |
|---------------------------------------------------------------------------------------------------------------------|----------------------------------------------------|----------------------------|--------------------------------------------|----------------------------|
| Random split                                                                                                        | Spectralis vs. Predicted Spectralis <sup>a-f</sup> |                            | Cirrus vs. Predicted Cirrus <sup>g-l</sup> |                            |
| <b>Limits of agreement<sup>m</sup> for micron differences (95% LOA) [95% CI], <math>\mu\text{m}^n</math></b>        |                                                    |                            |                                            |                            |
| Split used                                                                                                          | (-69, 69)                                          | [(-86, -56), (56, 86)]     | (-73, 73)                                  | [(-92, -59), (59, 92)]     |
| Alternate split 1                                                                                                   | (-68, 68)                                          | [(-83, -57), (57, 83)]     | (-70, 70)                                  | [(-86, -58), (58, 86)]     |
| Alternate split 2                                                                                                   | (-51, 51)                                          | [(-64, -42), (42, 64)]     | (-54, 54)                                  | [(-68, -44), (44, 68)]     |
| Alternate split 3                                                                                                   | (-56, 56)                                          | [(-70, -45), (45, 70)]     | (-54, 54)                                  | [(-67, -44), (44, 67)]     |
| Alternate split 4                                                                                                   | (-70, 70)                                          | [(-89, -55), (55, 89)]     | (-70, 70)                                  | [(-89, -56), (56, 89)]     |
| Alternate split 5                                                                                                   | (-48, 48)                                          | [(-59, -40), (40, 59)]     | (-47, 47)                                  | [(-57, -39), (39, 57)]     |
| <b>Limits of agreement<sup>m</sup> for relative differences (95% LOA) [95% CI], %<sup>o</sup></b>                   |                                                    |                            |                                            |                            |
| Split used                                                                                                          | (-17%, 17%)                                        | [(-21%, -14%), (14%, 21%)] | (-22%, 22%)                                | [(-28%, -18%), (18%, 28%)] |
| Alternate split 1                                                                                                   | (-18%, 18%)                                        | [(-21%, -15%), (15%, 21%)] | (-23%, 23%)                                | [(-28%, -19%), (19%, 28%)] |
| Alternate split 2                                                                                                   | (-12%, 12%)                                        | [(-15%, -10%), (10%, 15%)] | (-14%, 14%)                                | [(-18%, -12%), (12%, 18%)] |
| Alternate split 3                                                                                                   | (-14%, 14%)                                        | [(-17%, -11%), (11%, 17%)] | (-19%, 19%)                                | [(-23%, -15%), (15%, 23%)] |
| Alternate split 4                                                                                                   | (-15%, 15%)                                        | [(-19%, -12%), (12%, 19%)] | (-21%, 21%)                                | [(-26%, -16%), (16%, 26%)] |
| Alternate split 5                                                                                                   | (-14%, 14%)                                        | [(-17%, -12%), (12%, 17%)] | (-14%, 14%)                                | [(-17%, -12%), (12%, 17%)] |

<sup>a</sup> Predicted Spectralis = 40.78 + 0.95 × Cirrus (split used).

<sup>b</sup> Predicted Spectralis = 37.09 + 0.95 × Cirrus (alternate split 1).

<sup>c</sup> Predicted Spectralis = 49.55 + 0.92 × Cirrus (alternate split 2).

<sup>d</sup> Predicted Spectralis = 50.13 + 0.92 × Cirrus (alternate split 3).

<sup>e</sup> Predicted Spectralis = 41.75 + 0.94 × Cirrus (alternate split 4).

<sup>f</sup> Predicted Spectralis = 52.78 + 0.91 × Cirrus (alternate split 5).

<sup>g</sup> Predicted Cirrus = 1.82 + 0.94 × Spectralis (split used).

<sup>h</sup> Predicted Cirrus = -0.40 + 0.95 × Spectralis (alternate split 1).

<sup>i</sup> Predicted Cirrus = 3.63 + 0.94 × Spectralis (alternate split 2).

<sup>j</sup> Predicted Cirrus = -12.92 + 0.97 × Spectralis (alternate split 3).

<sup>k</sup> Predicted Cirrus = -12.92 + 0.98 × Spectralis (alternate split 4).

<sup>l</sup> Predicted Cirrus = -4.35 + 0.96 × Spectralis (alternate split 5).

<sup>m</sup> Limits of agreement were centered around zero (expected mean difference).

<sup>n</sup> Difference = predicted – observed value.

<sup>o</sup> Percent difference = [(predicted – observed value)/observed value] × 100%.

Abbreviations: CI = confidence interval; LOA = Limits of agreement.
